# Supplementary material for: Posterior Association Networks and Functional Modules Inferred from Rich Phenotypes of Gene Perturbations
Source: PLOS journal article supplement (doi:10.1371/journal.pcbi.1002566), 2012-06-28
Supplement: S1 (10.1371/journal.pcbi.1002566.s001) [file journal.pcbi.1002566.s001]

PAN

Hierarchical  
clustering

## Module Filtering Steps

1 module significance

module significance is assessed by  $p$ -values derived from multi-scale bootstrap resampling

2 module size

module size is the No. of genes in the module

3 module density

module density is defined as the ratio of the No. of edges and the No. of possible edges

4 module function

module function is quantified by the average loss-of-function of all genes in the module

selected modules
